# Supplementary material
Source: PubMed Central journal article supplement (PMC4542248)
Supplement: AEM.01626-15_zam999116560so1.pdf [file AEM.01626-15_zam999116560so1.pdf]

## Supplemental Material.

**Table S1.** Oligonucleotides used for qPCR analysis of the tomato development genes

| Gene        | Name    | Sequence (5'-3')     |
|-------------|---------|----------------------|
| <i>SUCS</i> | SUCS-F  | ATGAACCGAGTGAGGAATGG |
| <i>SUCS</i> | SUCS-R  | GCTGGACCACCGTGATTAGT |
| <i>ACCS</i> | ACCS2-F | AAGCGCGATGAGGTTAGGTA |
| <i>ACCS</i> | ACCS2-R | AAAGTGGACGCAAATCCATC |
| <i>GAI</i>  | GAI-F   | ACCTCCGGTGAACAATCAAG |
| <i>GAI</i>  | GAI-R   | GAACGCATTTGAACCCAGAT |

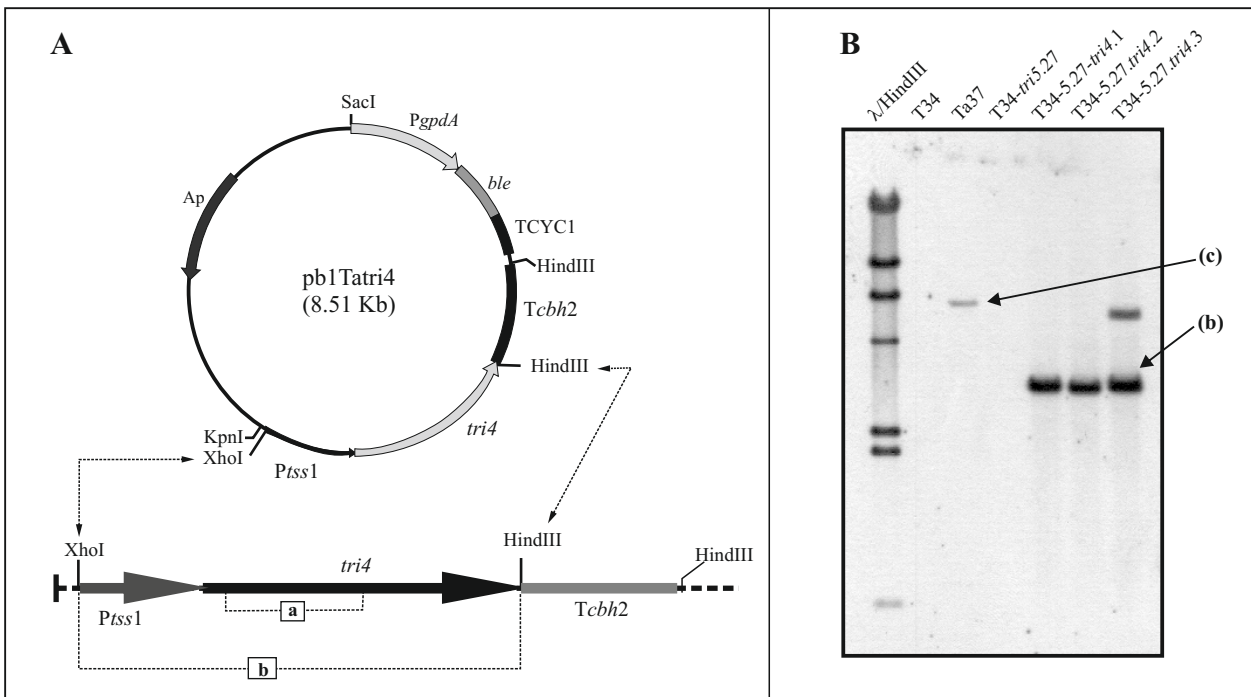

**Figure S1. A.** Representation of plasmid **pb1Tatri4**. *Pgpda*, promoter of the *gpda* gene from *Aspergillus nidulans*; *ble*, phleomycin resistance gene from *Streptoalloteichus hindustanus*; *TCYC1*, transcriptional terminator of the cytochrome C oxidase I encoding gene from *Saccharomyces cerevisiae*; *tri4*, *Trichoderma arundianaceum* IBT 40837 *tri4* gene; *Ptss1*, promoter of *tss1* gene from *Trichoderma harzianum* and *Tcbh2*, transcriptional terminator of the cellobiohydrolase 2 encoding gene from *Trichoderma reesei*. **B.** Southern of controls and *tri4* overexpressing transformants. DNAs were *XhoI*-*HindIII* digested. Note that *Trichoderma harzianum* CECT 2413 (T34) and T34-5.27 strains do not give any hybridization signal since the source of the *tri4* gene was the *Trichoderma arundinaceum* IBT 40837 (Ta37) strain, a producer of the trichothecene HA. **a**) 837 bp fragment used as a probe in this study; **b**) 2997 bp *XhoI*-*HindIII* fragment expected in the transformants as result of the hybridization with probe "a". **c**) 5911 bp signal corresponding to the endogenous *XhoI*-*HindIII* fragment of the Ta37 strain.

### A. T34-5.27-*tri4.1*

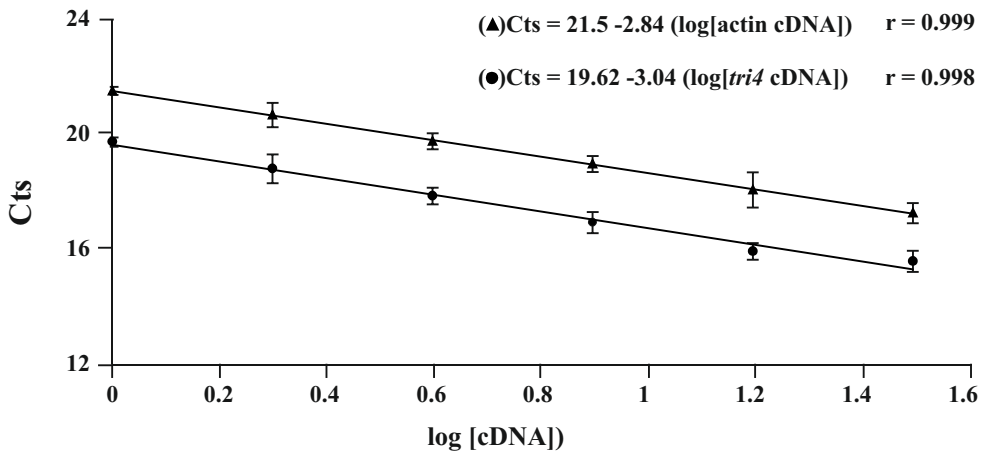

### B. T34-5.27-*tri4.2*

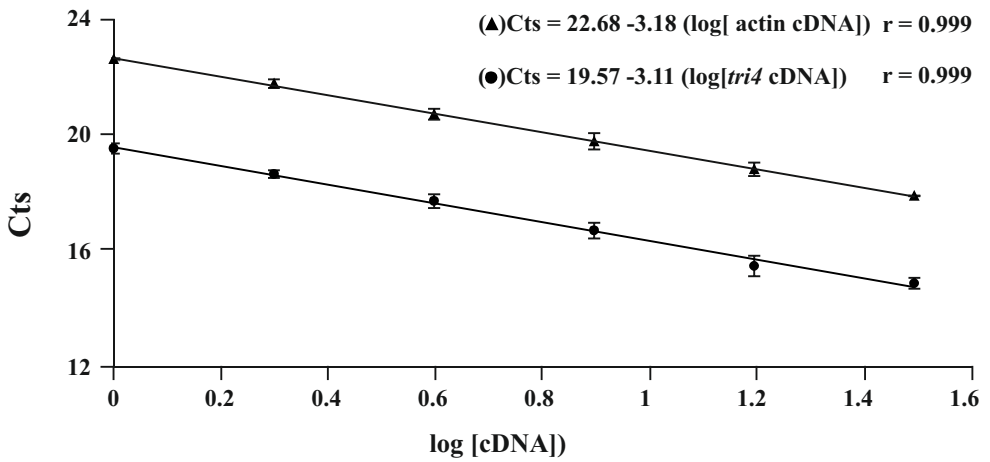

### C. T34-5.27-*tri4.3*

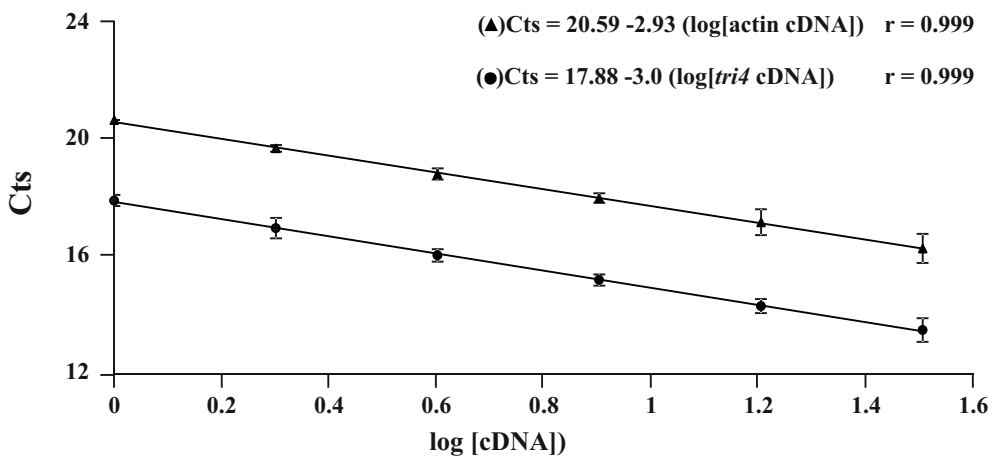

**Figure S2.** Calibration curves obtained for the genomic DNAs of the three T34-5.27-*tri4* expressing transformants analyzed in the present work to calculate the number of *tri4* gene copies integrated in the genome of each transformant (A-C). Oligonucleotides corresponding to *tri4* (lower calibration curve of each panel) and to the *actin* genes (upper calibration curve of each panel) were used for qPCR analysis (see Materials and Methods).

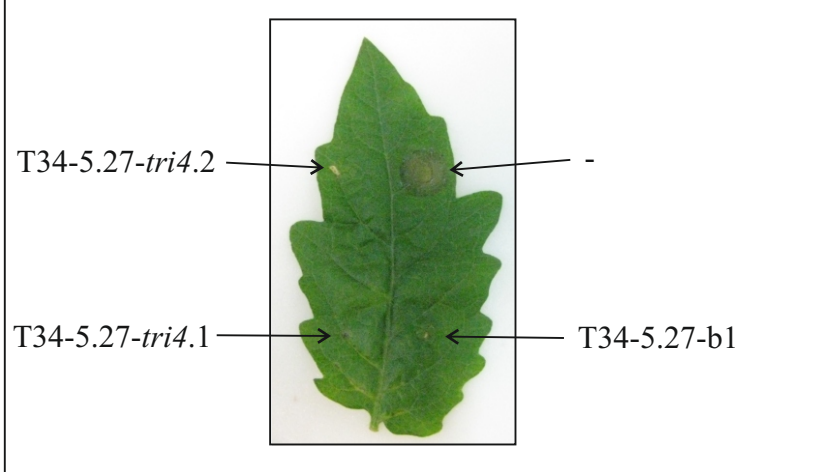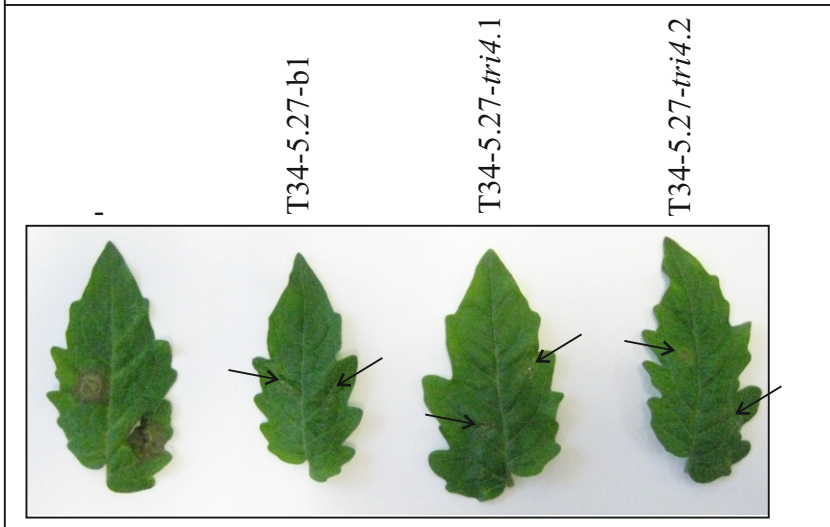

**Figure S3.** Pathogenicity assay of *B. cinerea* on detached tomato leaves of the Marmande variety. Leaves were inoculated with B05.10 spores in combination with broths from strains T34-5.27-b1, T34-5.27-*tri4.1* and T34-5.27-*tri4.2*, compared with the control (-) in which uninoculated PDB medium was added.

**A. T34-5.27-b1+B vs -T-B**

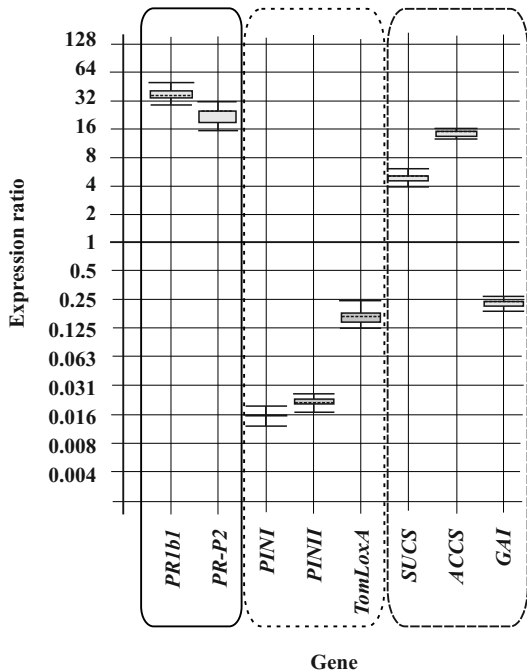

| Gene           | Expression ratio | <i>p</i> (H1) |
|----------------|------------------|---------------|
| <i>PR1b1</i>   | 35.431*          | 0.023         |
| <i>PR-P2</i>   | 20.341*          | 0.035         |
| <i>PINI</i>    | 0.016*           | 0.000         |
| <i>PINII</i>   | 0.022*           | 0.000         |
| <i>TomLoxA</i> | 0.169*           | 0.000         |
| <i>SUCS</i>    | 4.679*           | 0.018         |
| <i>ACCS</i>    | 14.110*          | 0.043         |
| <i>GAI</i>     | 0.229*           | 0.000         |

**B. T34-5.27-tri4.2+B vs -T-B**

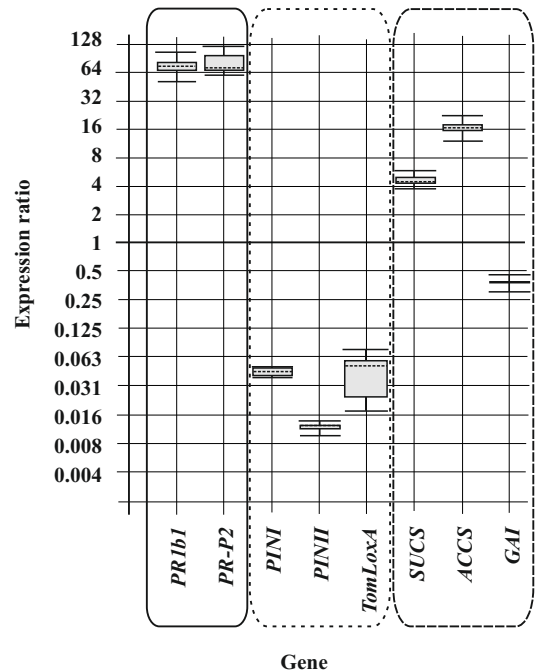

| Gene           | Expression ratio | <i>p</i> (H1) |
|----------------|------------------|---------------|
| <i>PR1b1</i>   | 70.573*          | 0.000         |
| <i>PR-P2</i>   | 77.378*          | 0.024         |
| <i>PINI</i>    | 0.044*           | 0.000         |
| <i>PINII</i>   | 0.012*           | 0.018         |
| <i>TomLoxA</i> | 0.042*           | 0.046         |
| <i>SUCS</i>    | 4.595*           | 0.018         |
| <i>ACCS</i>    | 16.328*          | 0.024         |
| <i>GAI</i>     | 0.385*           | 0.018         |

**Figure S4.** qPCR analysis of the relative level of expression of five tomato defense-related genes (*PR1b1*, *PR-P2*, *PINI*, *PINII* and *TomLoxA*) and three development-related genes (*SUCS*, *ACCS* and *GAI*) in leaves collected from tomato plants whose seeds were coated with conidia of T34-5.27-b1 or T34-5.27-tri4.2 strains, in both cases the plants were infected with B05.10 (+B) after four weeks of growth (see Material and Methods) versus the level of expression of these genes in plants not inoculated with *Trichoderma* nor infected with B05.10 (-T-B)(A, B). Comparison and graphic representations were carried out using the REST© software (\*). Those values indicated with an asterisk (boxed in the graphic representation) correspond to genes significantly differentially expressed ( $p \leq 0.05$ ) in comparison with the reference condition.

\*Pfaffl MW, Horgan GW, Dempfle L. 2002. Relative expression software tool (REST) for group-wise comparison and statistical analysis of relative expression results in real-time PCR. *Nucleic Acids Res* 30: e36.
